# Supplementary material for: UAV-based sampling systems to analyse greenhouse gases and volatile organic compounds encompassing compound-specific stable isotope analysis
Source: Copernicus journal article supplement (doi:10.5194/amt-16-513-2023), 2023-01-27
Supplement: Supplementary file 1 [file amt-16-513-2023-supplement.zip]

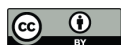

*Supplement of*

## **UAV-based sampling systems to analyse greenhouse gases and volatile organic compounds encompassing compound-specific stable isotope analysis**

**Simon Leitner et al.**

*Correspondence to:* Simon Leitner ([simon.leitner@boku.ac.at](mailto:simon.leitner@boku.ac.at))

- [amt-16-513-2023-supplement-title-page.pdf](#)
- [Data.publ.zip](#)
- [egusphere-2022-830-supplement.pdf](#)

The copyright of individual parts of the supplement might differ from the article licence.
