# Supplementary material for: UAV-based sampling systems to analyse greenhouse gases and volatile organic compounds encompassing compound-specific stable isotope analysis
Source: Copernicus journal article supplement (doi:10.5194/amt-16-513-2023), 2023-01-27
Supplement: Supplementary file 2 [file amt-16-513-2023-supplement.zip]

**Table S1. Technical description of the Hermes V2**

|                                      |                                                 |
|--------------------------------------|-------------------------------------------------|
| Climb Rate                           | 2.5 m/s                                         |
| Decent Rate                          | 2.0 m/s                                         |
| Horizontal Velocity                  | 0 - 12 m/s                                      |
| Max Operating Altitude               | Line of Sight                                   |
| Max Takeoff Mass                     | 12.25 kg                                        |
| Empty Mass                           | 5.45 kg                                         |
| Ready to Fly Mass                    | 7.25 kg                                         |
| Dimensions of Airframe               | 1500 mm (width) 1500 mm (depth) 635 mm (height) |
| Est Usable Time Aloft (Zero Payload) | 23 Minutes (22 vDC RTL)                         |
| Est Usable Time Aloft (Max Payload)  | 8 Minutes (22 vDC RTL)                          |
| Max Wind                             | 37 kph                                          |

t-Test of peak area values per injection volume obtained by the analysis via thermal desorption or purge and trap autosampling

- 5 **Table S2 Student-t-Test of mean values of injection volume specific peak area values obtained from TD and purge and trap (p&t) measurements for chlorinated ethenes within the liquid calibration standard (SD = standard deviation).**

| Compound | Peak Area <sub>mean</sub> | Peak Area <sub>sd</sub> | Method | p-value |
|----------|---------------------------|-------------------------|--------|---------|
| cDCE     | 2.53                      | 0.04                    | p&t    | 1.0     |
| cDCE     | 2.97                      | 0.34                    | TD     |         |
| PCE      | 2.29                      | 0.02                    | p&t    | 0.3     |
| PCE      | 2.25                      | 0.27                    | TD     |         |
| TCE      | 2.48                      | 0.01                    | p&t    | 1.0     |
| TCE      | 2.77                      | 0.34                    | TD     |         |
| tDCE     | 2.25                      | 0.07                    | p&t    | 1.0     |
| tDCE     | 2.41                      | 0.23                    | TD     |         |
