# Supplementary material for: UAV-based sampling systems to analyse greenhouse gases and volatile organic compounds encompassing compound-specific stable isotope analysis
Source: Copernicus journal article supplement (doi:10.5194/amt-16-513-2023), 2023-01-27
Supplement: Supplementary file 3 [file amt-16-513-2023-supplement.zip]

Archive with 3 entries (3 files):
- egusphere-2022-830-supplement.pdf
- Data.publ.zip
- amt-16-513-2023-supplement-title-page.pdf
